# Supplementary material for: Occurrence and Dissipation of the Antibiotics Sulfamethoxazole, Sulfadiazine, Trimethoprim, and Enrofloxacin in the Mekong Delta, Vietnam
Source: PubMed Central journal article supplement (PMC4489625; doi:10.1371/journal.pone.0131855), 2015-07-02
Supplement: pone.0131855.s001.pdf [file pone.0131855.s001.pdf]

**S1 Table.** Basic characteristics of water and sediment of the fate study experiment. A: water: water system, no light control, B: water: sediment system, non light control, C: water: sediment system, light control D: water: water system, light control

| <b>Water</b>                  | A     | B    | C    | D    |
|-------------------------------|-------|------|------|------|
| pH                            | 8,56  | 7,17 | 7,05 | 7,82 |
| EC                            | 190   | 161  | 168  | 184  |
| DO                            | 10,15 | 5,63 | 2,73 | 6,43 |
| Temp (°C)                     | 30,7  | 31,6 | 30,7 | 30,3 |
| TN (mg L <sup>-1</sup> )      | 3,08  | 3,36 | 2,8  | 2,8  |
| TP (mg L <sup>-1</sup> )      | 0,57  | 1,06 | 0,72 | 0,73 |
| TOC (mg L <sup>-1</sup> )     | 2,09  | 2,78 | 2,77 | 2,39 |
| <b>Sediment</b>               |       | B    | C    |      |
| pH <sub>water</sub> (1:2.5)   |       | 5,07 | 4,97 |      |
| TC (CHC) (%C)                 |       | 3,67 | 4,36 |      |
| TN (%)                        |       | 0,13 | 0,15 |      |
| CEC (cmol kg <sup>-1</sup> )  |       | 14,2 | 13,7 |      |
| Density (g cm <sup>-3</sup> ) |       | 2,5  | 2,56 |      |
