# Supplementary material for: Occurrence and Dissipation of the Antibiotics Sulfamethoxazole, Sulfadiazine, Trimethoprim, and Enrofloxacin in the Mekong Delta, Vietnam
Source: PubMed Central journal article supplement (PMC4489625; doi:10.1371/journal.pone.0131855), 2015-07-02
Supplement: pone.0131855.s002.pdf [file pone.0131855.s002.pdf]

**S2 Table.** Assessment factors to derive a  $PNEC_{\text{aquatic}}$  [45]

| <b>Available data</b>                                                                                                  | <b>Assessment factor</b>                    |
|------------------------------------------------------------------------------------------------------------------------|---------------------------------------------|
| At least one short-term L(E)C <sub>50</sub> from each of three trophic levels of the baseset (fish, Daphnia and algae) | 1000                                        |
| One long-term NOEC (either fish or Daphnia)                                                                            | 100                                         |
| Two long-term NOECs from species representing two trophic levels (fish and/or Daphnia and/or algae)                    | 50                                          |
| Long-term NOECs from at least three species (normally fish, Daphnia and algae) representing three trophic levels       | 10                                          |
| Species sensitivity distribution (SSD) method                                                                          | 5-1<br>(to be fully justified case by case) |
| Field data or model ecosystems                                                                                         | Reviewed on a case by case basis            |
